# Supplementary material for: Brief communication: Unabated wastage of the Juneau and Stikine icefields (southeast Alaska) in the early 21 st century
Source: Copernicus journal article supplement (doi:10.5194/tc-2017-272), 2018-01-05
Supplement: Supplementary file 1 [file tc-2017-272-supplement.pdf]

## Supplement

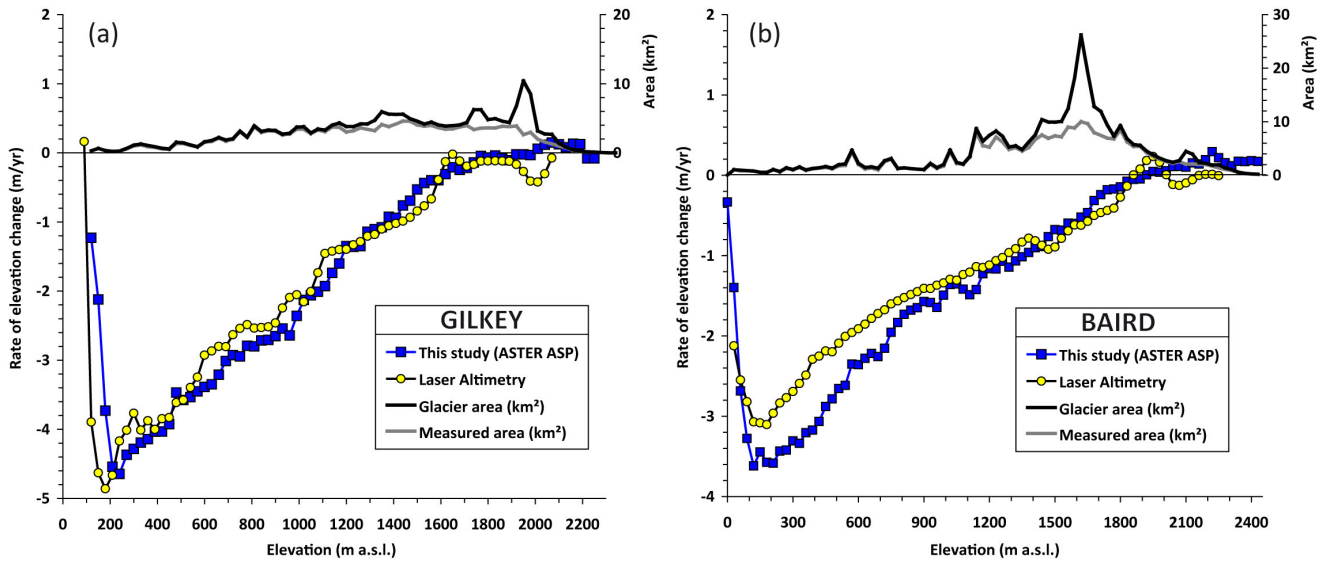

**Supplementary Figure S1:** Rates of elevation change vs. elevation for (a) Gilkey Glacier (Juneau Icefield) and (b) Baird Glacier (Stikine Icefield) measured from ASTER DEMs (blue curve, 2000-2016) and airborne laser altimetry data (2007-2012 for Gilkey and 1996-2013 for Stikine). The upper curve (right Y-axis) show the total area altitude distribution (black) and the glacier area effectively sampled using in the ASTER<sub>dh/dt</sub> (grey).
